# Supplementary material for: An Oxalate-Bridged Copper(II) Complex Combining Monodentate Benzoate, 2,2′-bipyridine and Aqua Ligands: Synthesis, Crystal Structure and Investigation of Magnetic Properties
Source: PubMed Central journal article supplement (PMC7221668; doi:10.3390/molecules25081898), 2020-04-20
Supplement: molecules-25-01898-s001.pdf [file molecules-25-01898-s001.pdf]

## Electronic Supporting Information

### **An oxalate-bridged copper(II) complex combining monodentate benzoate, 2,2'-bipyridine and aqua ligands: synthesis, crystal structure and investigation of magnetic properties**

Francielli Sousa Santana<sup>a</sup>, Matteo Briganti<sup>b</sup>, Rafael A. Allão Cassaro<sup>c</sup>, Federico Totti<sup>d</sup>, Ronny Rocha Ribeiro<sup>b</sup>, David L. Hughes<sup>e</sup>, Giovana Gioppo Nunes<sup>b</sup>, Dayane Mey Reis<sup>a,\*</sup>

<sup>a</sup> Departamento de Química e Biologia, Universidade Tecnológica Federal do Paraná, Cidade Industrial, 81280-340 Curitiba, PR, Brazil.

<sup>b</sup> Departamento de Química, Universidade Federal do Paraná, Centro Politécnico, Jardim das Américas, 81531-980 Curitiba, PR, Brazil.

<sup>c</sup> Instituto de Química, Universidade Federal do Rio de Janeiro, 21941-909 Rio de Janeiro, RJ, Brazil.

<sup>d</sup> Dipartimento di Chimica "U.Schiff" and UdR INSTM Università degli Studi di Firenze, Via della Lastruccia 3-13, 50019 Sesto Fiorentino, Italy.

<sup>e</sup> School of Chemistry, University of East Anglia, Norwich NR4 7TJ, United Kingdom.

\* Corresponding author.

E-mail address: dayane@utfpr.edu.br (Dayane Mey Reis).

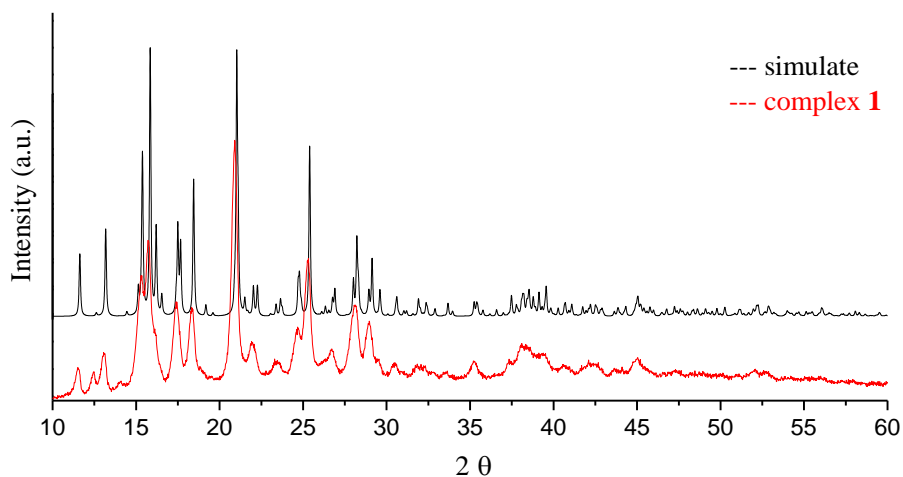

**Figure S1:** Comparison between simulated and experimental PXRD patterns of complex **1** (scan velocity:  $0.005\text{ }^{\circ}\text{s}^{-1}$ ).

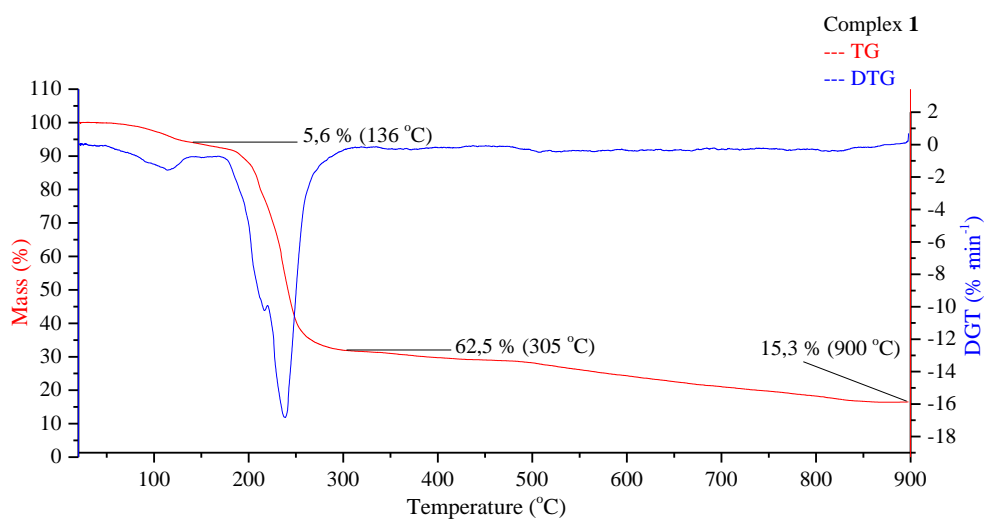

**Figure S2:** Thermogravimetric analysis (TG and DTG) profiles obtained for **1** in  $\text{O}_2/\text{N}_2$  as carrier gas and temperature range of 20 to 900  $^{\circ}\text{C}$ .

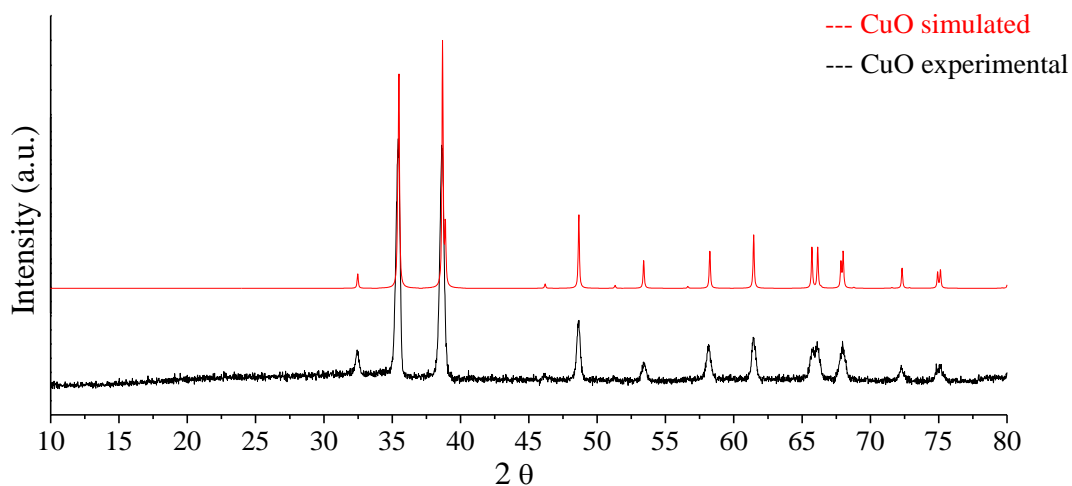

**Figure S3:** Comparison between simulated and experimental PXRD patterns of CuO (scan velocity:  $0.005^\circ \text{ s}^{-1}$ ).

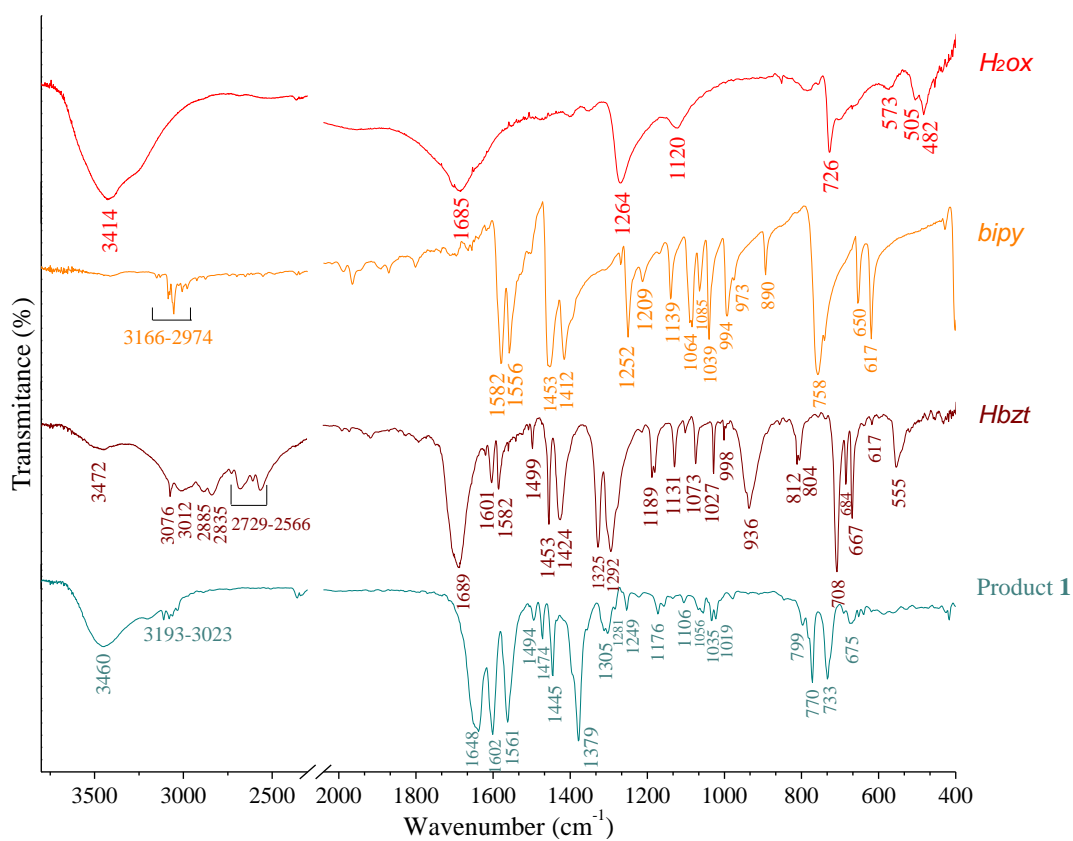

**Figure S4:** Infrared spectra of **1** and its starting materials,  $\text{H}_2\text{ox}\cdot 2\text{H}_2\text{O}$ , *Hbzt*, and *bipy* recorded from KBr pellets.

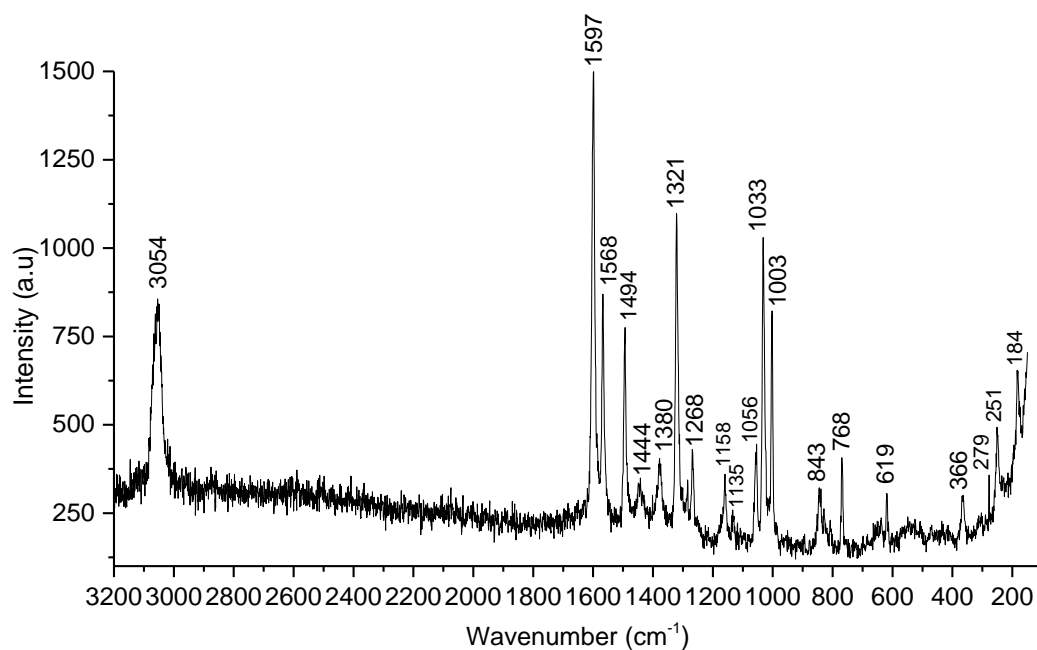

**Figure S5:** Raman spectrum recorded for **1** with exposure time of 10 s and power at 50 % (laser: He-Ne, 632.8 nm).

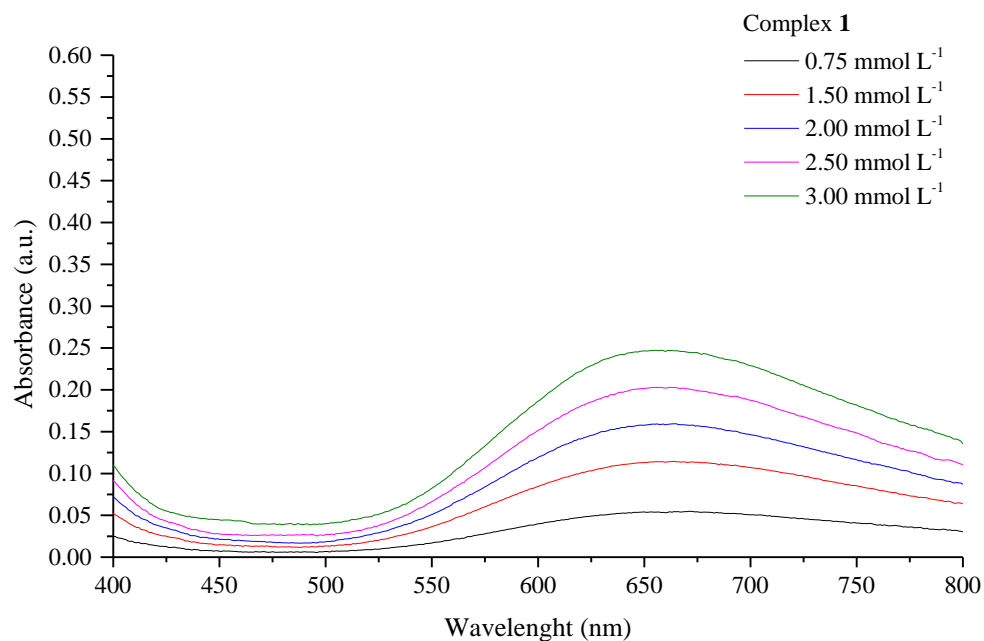

**Figure S6:** UV-Vis absorption spectra recorded for complex **1** at 3.00, 2.50, 2.00, 1.50, and 0.75 mmol L<sup>-1</sup> in water.

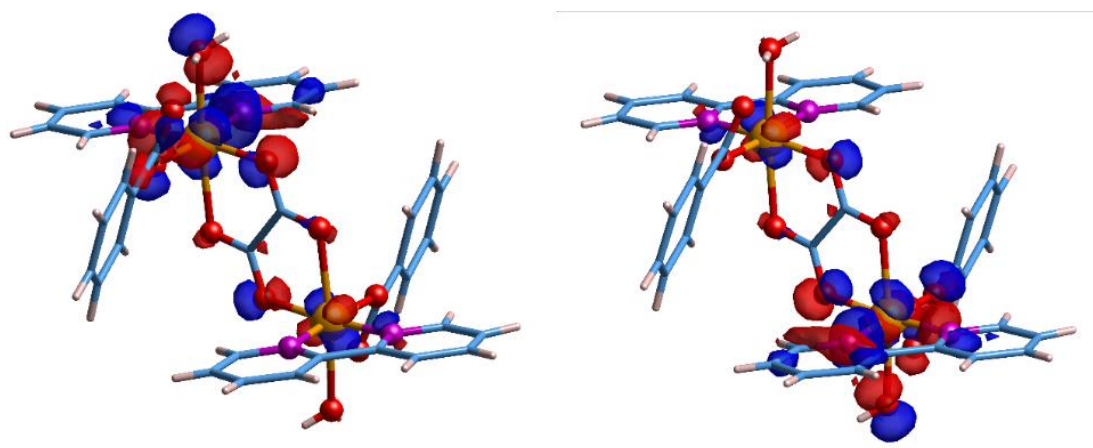

**Figure S7:** Graphic representation of the two occupied broken symmetry (BS), spin up and spin down, magnetic orbitals for complex **1**. The electron density isovalue was set to  $0.04 e/(a_0)^3$ . Light-blue: carbon, white: hydrogen; red: oxygen; orange: copper; pink: nitrogen.

**Table S1:** Values of  $2\theta$  angles for the experimental and simulated PXRD diffractograms of **1** from  $10$  to  $30^\circ$  displaying a difference of *ca*  $0.1^\circ$

| Experimental ( $2\theta$ ) | Simulated ( $2\theta$ ) |
|----------------------------|-------------------------|
| 11.58                      | 11.66                   |
| 12.5                       | 12.58                   |
| 13.06                      | 13.16                   |
| 14.08                      | 14.46                   |
| 15.32                      | 15.34                   |
| 15.7                       | 15.08                   |
| 16.14                      | 16.18                   |
| np*                        | 16.56                   |
| 17.38                      | 17.5                    |
| 18.32                      | 18.42                   |
| **                         | 19.18                   |
| 20.9                       | 21.06                   |
| np                         | 21.52                   |
| 21.96                      | 22.18                   |
| 23.42                      | 23.6                    |
| 24.66                      | 24.72                   |
| 25.26                      | 25.38                   |
| **                         | 26.3                    |
| 26.72                      | 26.88                   |
| 28.08                      | 28.18                   |
| 28.98                      | 29.12                   |
| 29.46                      | 29.6                    |

\*np = not present (it is a low-intensity peak in the theoretical diffractogram).

\*\* = there is a shoulder at the nearby experimental peak that could refer to this low-intensity peak present in the simulated diffractogram.

**Table S2:** Hydrogen bond parameters (Å, °)

| D–H···A                          | D–H       | H···A   | D···A    | D–H···A |
|----------------------------------|-----------|---------|----------|---------|
| C(4)–H(4)···O(8) <sup>ii</sup>   | 0.92      | 2.28    | 3.096(4) | 143.9   |
| O(1)–H(1B)···O(8) <sup>iii</sup> | 0.817(18) | 2.21(2) | 2.954(3) | 152(3)  |
| O(1)–H(1A)···O(7)                | 0.836(18) | 1.95(2) | 2.723(3) | 153(3)  |

Symmetry codes: (ii) -x+1, -y+1, -z+1; (iii) x-1, y, z.

**Table S3:** Thermal data for **1**.

| Step         | Temp. range (°C) | Mass loss (%) |             | Possible moieties lost through decomposition |
|--------------|------------------|---------------|-------------|----------------------------------------------|
|              |                  | Found         | Calculated  |                                              |
| <b>I</b>     | 54.8-135.8       | 5.6           | 4.5         | 2 H <sub>2</sub> O                           |
| <b>II</b>    | 135.8-305.2      | 62.5          | 68.9        | 2 <i>bzt</i> + 2 <i>bipy</i>                 |
| <b>III</b>   | 305.2-900        | 15.3          | 10.9        | <i>ox</i>                                    |
| <b>Total</b> | -                | <b>83.4</b>   | <b>84.3</b> |                                              |

**Table S4:** Tentative assignments for the IR (cm<sup>-1</sup>) spectrum recorded for complex **1** [1-4]

| Tentative assignments <sup>a</sup>   | Complex <b>1</b> | <i>H<sub>2</sub>ox</i> | <i>Hbzt</i> | <i>bipy</i> |
|--------------------------------------|------------------|------------------------|-------------|-------------|
| $\nu_{as,rs}(\text{OH})$             | 3460             | 3414                   | 3472-2835   | -           |
| $\nu_{as}(\text{CH})$                | 3193-3023        | -                      | 3076-3012   | 3166-2974   |
| $\nu_s(\text{CH})$                   | -                | -                      | 2885-2566   | -           |
| $\nu_{as}(\text{CO})_{\text{COOH}}$  | -                | 1685                   | 1689        | -           |
| $\nu_{as}(\text{CO})_{\text{COO}^-}$ | 1648             | -                      | -           | -           |
| $\nu_s(\text{CC e CN})$              | 1602-1412        | -                      | 1601-1453   | 1582-1412   |
| $\nu_s(\text{CO})_{\text{COO}^-}$    | 1379             | -                      | -           | -           |
| $\delta(\text{CH})$                  | 1305-1019        | 1120; 726              | 1424-998    | 1252-973    |
| $\beta(\text{CH})$                   | 779-675          | -                      | 812-555     | 890-617     |
| $\beta(\text{CC})$                   | -                | 726                    | -           | -           |
| $\beta(\text{OH})_{\text{COOH}}$     | -                | -                      | 936         | -           |
| $\delta(\text{OH})_{\text{COOH}}$    | -                | 1264                   | 1424        | -           |

<sup>(a)</sup>  $\nu_s$ , asymmetrical stretching;  $\nu_s$ , symmetrical stretching;  $\delta$ , in-plane angular deformation;  $\beta$ , out-of-plane angular deformation.

**Table S5:** Tentative assignments for the Raman scattering (cm<sup>-1</sup>) spectrum recorded for complex **1** [5-8]

| Tentative assignments <sup>(a)</sup>         | Complex 1 |
|----------------------------------------------|-----------|
| $\nu_s(\text{OH})$                           | 3054      |
| $\nu_{\text{ass}}(\text{CO})_{\text{COO}^-}$ | 1597      |
| $\nu_s(\text{CC ou CN})$                     | 1597-1494 |
| $\delta(\text{CH})$                          | 1444      |
| $\nu_s(\text{CO})_{\text{COO}^-}$            | 1380      |
| $\delta(\text{CCH})$                         | 1268      |
| $\delta(\text{CC})_{\text{ring}}$            | 1056      |
| $\delta(\text{OCO})$                         | 843       |
| $\nu(\text{Cu-O, Cu-N})$                     | 619-366   |

<sup>(a)</sup>  $\nu_{\text{as}}$ , asymmetrical stretching;  $\nu_s$ , symmetrical stretching;  $\delta$ , in-plane angular deformation.

## References

1. Silverstein, R. M.; Webster, F. X.; Kiemle, D. J. *Spectrometric identification of organic compounds*. 7ed.; John Wiley & Sons: 2014.
2. NAKAMOTO, K., *Infrared and Raman Spectra of Inorganic and Coordination Compounds - Part B: applications in coordination, organometallic, and bioinorganic chemistry*. 6 ed.; Wiley & Sons: New Jersey, 2009.
3. Stepanian, S. G.; Reva, I. D.; Radchenko, E. D.; Sheina, G. G., Infrared spectra of benzoic acid monomers and dimers in argon matrix. *Vib. Spectrosc.* **1996**, 11, 123-133.
4. Androš, L.; Jurić, M.; Planinić, P.; Žilić, D.; Rakvin, B.; Molčanov, K., New mononuclear oxalate complexes of copper(II) with 2D and 3D architectures: Synthesis, crystal structures and spectroscopic characterization. *Polyhedron* **2010**, 29, 1291-1298.
5. Helios, K.; Wysokiński, R.; Pietraszko, A.; Michalska, D., Vibrational spectra and reinvestigation of the crystal structure of a polymeric copper(II)-orotate complex,  $[\text{Cu}(\mu\text{-HOOr})(\text{H}_2\text{O})_2]_n$ : The performance of new DFT methods, M06 and M05-2X, in theoretical studies. *Vib. Spectrosc.* **2011**, 55, 207-215.
6. Edwards, H. G. M.; Farwell, D. W.; Rose, S. J.; Smith, D. N., Vibrational spectra of copper (II) oxalate dihydrate,  $\text{CuC}_2\text{O}_4 \cdot 2\text{H}_2\text{O}$ , and dipotassium bis-oxalato copper(II) tetrahydrate,  $\text{K}_2\text{Cu}(\text{C}_2\text{O}_4)_2 \cdot 4\text{H}_2\text{O}$ . *J. Mol. Struct.* **1991**, 249, 233-243.
7. Wang, Z. P.; Tang, X. D.; Ding, Z. J., Raman and photoluminescence spectroscopy study of benzoic acid at high pressures. *J. Phys. Chem. Solids.* **2005**, 66, 895-901.
8. Brolo, A. G.; Jiang, Z.; Irish, D. E., The orientation of 2,2'-bipyridine adsorbed at a SERS-active Au(111) electrode surface. *J. Electroanal. Chem.* **2003**, 547, 163-172.
